# Supplementary material for: Thermoelectric properties of Gd and Se double substituted tetrahedrite
Source: Royal Society of Chemistry journal article supplement (doi:10.1039/d3dt03795a), 2024-01-01
Supplement: d3dt03795a1.pdf [file d3dt03795a1.pdf]

# Thermoelectric Properties of Gd and Se Double Substituted Tetrahedrite

Umasankar Rout, and Ramesh Chandra Mallik\*

Thermoelectric Materials and Devices Laboratory, Department of Physics, Indian Institute of Science, Bangalore, 560012, India

## 1. X-ray diffraction

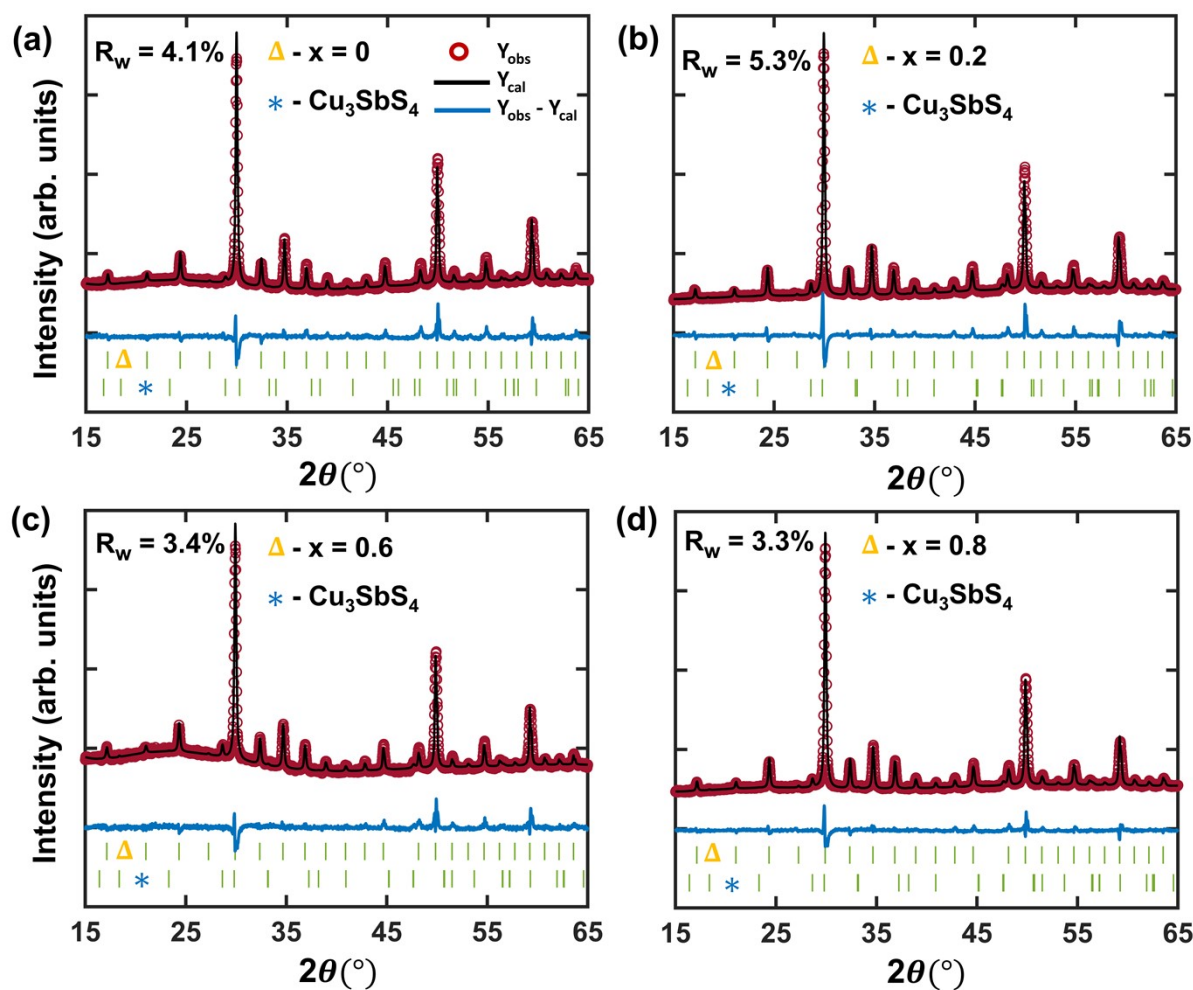

**Fig. S1** Rietveld refined patterns of the samples (a)  $x = 0$ , (b)  $x = 0.2$ , (c)  $x = 0.6$ , and (d)  $x = 0.8$ .

\* Author to whom correspondence to be addressed: [rmallik@iisc.ac.in](mailto:rmallik@iisc.ac.in)

**Table S1** Rietveld refinement results for Gd and Se double substituted samples.

| Sample  | Lattice parameters, a=b=c (in Å) | Cu <sub>12</sub> Sb <sub>4</sub> S <sub>13</sub> (in wt %) | Cu <sub>3</sub> SbS <sub>4</sub> (in wt %) | Theoretical Density (in g cm <sup>-3</sup> ) | Measured Density (g cm <sup>-3</sup> ) | Rw   |
|---------|----------------------------------|------------------------------------------------------------|--------------------------------------------|----------------------------------------------|----------------------------------------|------|
| x = 0   | 10.324(6)                        | 97.56(3)                                                   | 2.4(3)                                     | 4.93(2)                                      | 4.86 (98.5%)                           | 4.1% |
| x = 0.2 | 10.331(7)                        | 96.84(8)                                                   | 3.1(5)                                     | 4.92(7)                                      | 4.86 (98.7%)                           | 5.3% |
| x = 0.4 | 10.336(1)                        | 97.91(2)                                                   | 2.0(8)                                     | 4.96(4)                                      | 4.88 (98.3%)                           | 4.1% |
| x = 0.6 | 10.339(4)                        | 96.30(7)                                                   | 3.6(9)                                     | 5.10(2)                                      | 4.91 (96.2%)                           | 3.4% |
| x = 0.8 | 10.345(4)                        | 97.04(8)                                                   | 2.9(5)                                     | 5.12(5)                                      | 4.93 (96.2%)                           | 3.3% |

The Uiso values were fixed in the Rietveld refinement, the Uiso for the host and substituent were kept the same (The Uiso values were referred from ICSD #14619), and the site occupancies (SOFs) were first calculated from the observed EPMA value and further refined. While refining the SOF, we allowed only those refined values that were physically meaningful. The refined occupancies and positions are provided with observed standard deviations.

**Table S2** The Wyckoff sites and atomic coordinates (x, y, z) for the Cu<sub>11.95</sub>Gd<sub>0.05</sub>Sb<sub>4</sub>S<sub>13</sub> sample.

| Atoms        | Site | x                            | y                            | z                            | SOF                          | Uiso   |
|--------------|------|------------------------------|------------------------------|------------------------------|------------------------------|--------|
| <b>Gd</b>    | 12d  | 0.5                          | 0.25                         | 0                            | 0.0017                       | 0.0213 |
| <b>Cu(1)</b> | 12d  | 0.5                          | 0.25                         | 0                            | 0.9665(±3×10 <sup>-4</sup> ) | 0.0213 |
| <b>Cu(2)</b> | 12e  | 0                            | 0                            | 0.2198(±2×10 <sup>-4</sup> ) | 1                            | 0.0630 |
| <b>Sb</b>    | 8c   | 0.2685(±4×10 <sup>-4</sup> ) | 0.2685(±4×10 <sup>-4</sup> ) | 0.2685(±4×10 <sup>-4</sup> ) | 0.9576(±2×10 <sup>-4</sup> ) | 0.0213 |
| <b>S(1)</b>  | 24g  | 0.8832(±2×10 <sup>-4</sup> ) | 0.8830(±2×10 <sup>-4</sup> ) | 0.3674(±3×10 <sup>-4</sup> ) | 1                            | 0.0205 |
| <b>S(2)</b>  | 2a   | 0                            | 0                            | 0                            | 1                            | 0.0201 |

**Table S3** The Wyckoff sites and atomic coordinates (x, y, z) for the Cu<sub>11.95</sub>Gd<sub>0.05</sub>Sb<sub>4</sub>S<sub>12.8</sub>Se<sub>0.2</sub> sample.

| Atoms | Site | x                                | y                                | z                                | SOF                              | Uiso   |
|-------|------|----------------------------------|----------------------------------|----------------------------------|----------------------------------|--------|
| Gd    | 12d  | 0.5                              | 0.25                             | 0                                | 0.0017                           | 0.0213 |
| Cu(1) | 12d  | 0.5                              | 0.25                             | 0                                | 0.9653( $\pm 2 \times 10^{-4}$ ) | 0.0213 |
| Cu(2) | 12e  | 0                                | 0                                | 0.2169( $\pm 3 \times 10^{-4}$ ) | 1                                | 0.0630 |
| Sb    | 8c   | 0.2687( $\pm 6 \times 10^{-4}$ ) | 0.2687( $\pm 6 \times 10^{-4}$ ) | 0.2687( $\pm 6 \times 10^{-4}$ ) | 0.9448( $\pm 8 \times 10^{-4}$ ) | 0.0213 |
| Se    | 24g  | 0.8722( $\pm 5 \times 10^{-4}$ ) | 0.8722( $\pm 5 \times 10^{-4}$ ) | 0.3856( $\pm 5 \times 10^{-4}$ ) | 0.0158                           | 0.0205 |
| S(1)  | 24g  | 0.8852( $\pm 7 \times 10^{-4}$ ) | 0.8852( $\pm 7 \times 10^{-4}$ ) | 0.3653( $\pm 4 \times 10^{-4}$ ) | 0.9833                           | 0.0205 |
| S(2)  | 2a   | 0                                | 0                                | 0                                | 1                                | 0.0201 |

**Table S4** The Wyckoff sites and atomic coordinates (x, y, z) for the  $\text{Cu}_{11.95}\text{Gd}_{0.05}\text{Sb}_4\text{S}_{12.6}\text{Se}_{0.4}$  sample.

| Atoms | Site | x                                | y                                | z                                | SOF                              | Uiso   |
|-------|------|----------------------------------|----------------------------------|----------------------------------|----------------------------------|--------|
| Gd    | 12d  | 0.5                              | 0.25                             | 0                                | 0.0017                           | 0.0213 |
| Cu(1) | 12d  | 0.5                              | 0.25                             | 0                                | 0.9983                           | 0.0213 |
| Cu(2) | 12e  | 0                                | 0                                | 0.2187( $\pm 6 \times 10^{-4}$ ) | 0.9672( $\pm 6 \times 10^{-4}$ ) | 0.0630 |
| Sb    | 8c   | 0.2694( $\pm 4 \times 10^{-4}$ ) | 0.2694( $\pm 4 \times 10^{-4}$ ) | 0.2694( $\pm 4 \times 10^{-4}$ ) | 0.9538( $\pm 5 \times 10^{-4}$ ) | 0.0213 |
| Se    | 24g  | 0.8767( $\pm 2 \times 10^{-4}$ ) | 0.8767( $\pm 2 \times 10^{-4}$ ) | 0.3703( $\pm 3 \times 10^{-4}$ ) | 0.0325                           | 0.0205 |
| S(1)  | 24g  | 0.8844( $\pm 3 \times 10^{-4}$ ) | 0.8844( $\pm 3 \times 10^{-4}$ ) | 0.3635( $\pm 3 \times 10^{-4}$ ) | 0.9675                           | 0.0205 |
| S(2)  | 2a   | 0                                | 0                                | 0                                | 1                                | 0.0201 |

**Table S5** The Wyckoff sites and atomic coordinates (x, y, z) for the  $\text{Cu}_{11.95}\text{Gd}_{0.05}\text{Sb}_4\text{S}_{12.4}\text{Se}_{0.6}$  sample.

| Atoms | Site | x                                | y                                | z                                | SOF                              | Uiso   |
|-------|------|----------------------------------|----------------------------------|----------------------------------|----------------------------------|--------|
| Gd    | 12d  | 0.5                              | 0.25                             | 0                                | 0.0015                           | 0.0213 |
| Cu(1) | 12d  | 0.5                              | 0.25                             | 0                                | 0.9985                           | 0.0213 |
| Cu(2) | 12e  | 0                                | 0                                | 0.2171( $\pm 2 \times 10^{-4}$ ) | 1                                | 0.0630 |
| Sb    | 8c   | 0.2685( $\pm 3 \times 10^{-4}$ ) | 0.2685( $\pm 3 \times 10^{-4}$ ) | 0.2685( $\pm 3 \times 10^{-4}$ ) | 0.9754( $\pm 6 \times 10^{-4}$ ) | 0.0213 |
| Se    | 24g  | 0.8788( $\pm 2 \times 10^{-4}$ ) | 0.8788( $\pm 2 \times 10^{-4}$ ) | 0.3689( $\pm 3 \times 10^{-4}$ ) | 0.0558                           | 0.0205 |
| S(1)  | 24g  | 0.8841( $\pm 5 \times 10^{-4}$ ) | 0.8841( $\pm 5 \times 10^{-4}$ ) | 0.3653( $\pm 4 \times 10^{-4}$ ) | 0.9442                           | 0.0205 |
| S(2)  | 2a   | 0                                | 0                                | 0                                | 1                                | 0.0201 |

**Table S6** The Wyckoff sites and atomic coordinates (x, y, z) for the  $\text{Cu}_{11.95}\text{Gd}_{0.05}\text{Sb}_4\text{S}_{12.2}\text{Se}_{0.8}$  sample.

| Atoms | Site | x                                | y                                | z                                | SOF                              | Uiso   |
|-------|------|----------------------------------|----------------------------------|----------------------------------|----------------------------------|--------|
| Gd    | 12d  | 0.5                              | 0.25                             | 0                                | 0.0015                           | 0.0213 |
| Cu(1) | 12d  | 0.5                              | 0.25                             | 0                                | 0.9975                           | 0.0213 |
| Cu(2) | 12e  | 0                                | 0                                | 0.2171( $\pm 5 \times 10^{-4}$ ) | 0.9952( $\pm 3 \times 10^{-4}$ ) | 0.0630 |
| Sb    | 8c   | 0.2688( $\pm 3 \times 10^{-4}$ ) | 0.2688( $\pm 3 \times 10^{-4}$ ) | 0.2688( $\pm 3 \times 10^{-4}$ ) | 0.9738( $\pm 4 \times 10^{-4}$ ) | 0.0213 |
| Se    | 24g  | 0.8848( $\pm 2 \times 10^{-4}$ ) | 0.8848( $\pm 2 \times 10^{-4}$ ) | 0.3689( $\pm 5 \times 10^{-4}$ ) | 0.0861                           | 0.0205 |
| S(1)  | 24g  | 0.8867( $\pm 2 \times 10^{-4}$ ) | 0.8867( $\pm 2 \times 10^{-4}$ ) | 0.3687( $\pm 4 \times 10^{-4}$ ) | 0.9362( $\pm 6 \times 10^{-4}$ ) | 0.0205 |
| S(2)  | 2a   | 0                                | 0                                | 0                                | 1                                | 0.0201 |

**Table S7** Lattice parameters a and b (in Å) of the  $\text{Cu}_3\text{SbS}_4$  phase in the double substituted samples.

| Samples | a=b (Å)  | c (Å)     |
|---------|----------|-----------|
| x = 0   | 5.389(4) | 10.568(9) |
| x = 0.2 | 5.381(9) | 10.814(5) |
| x = 0.4 | 5.386(5) | 10.803(1) |
| x = 0.6 | 5.399(7) | 10.794(5) |
| x = 0.8 | 5.393(4) | 10.811(2) |

## 2. Microstructural analysis

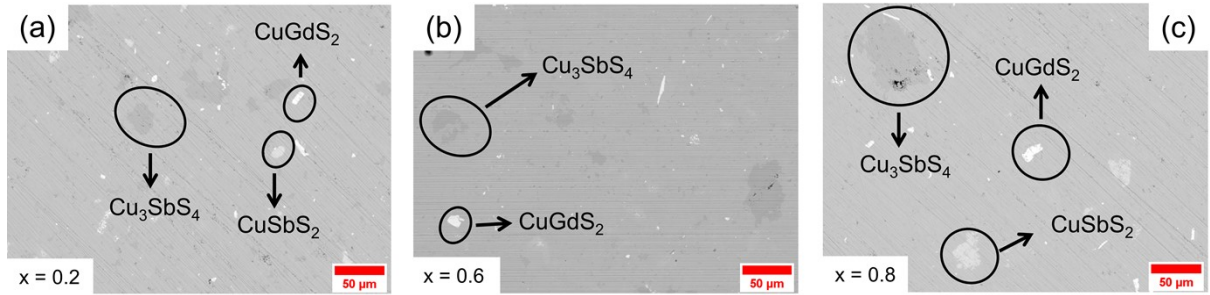

**Fig. S2** Backscattered electron (BSE) image of the polished surface of the samples (a)  $x = 0.2$ ,  $x = 0.6$ , and  $x = 0.8$ .

### 3. X-ray photoelectron spectroscopy

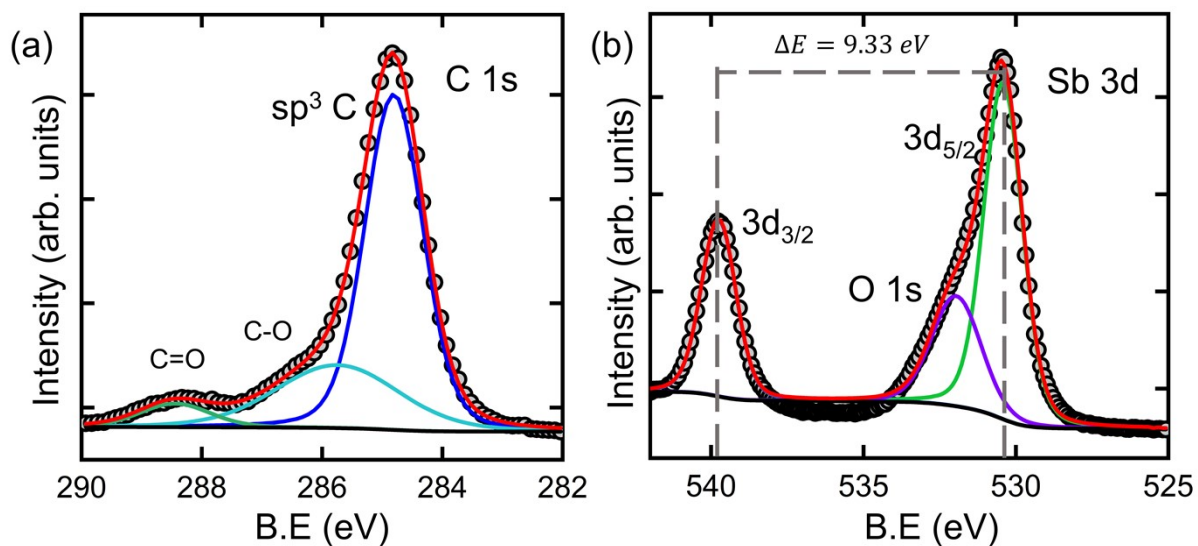

**Fig. S3** X-ray photoelectron spectra corresponding to (a) C 1s and (b) Sb 3d lines in the sample  $x = 0.4$  ( $\text{Cu}_{11.95}\text{Gd}_{0.05}\text{Sb}_4\text{S}_{12.6}\text{Se}_4$ ).

**Table S8** Binding energy and oxidation states for the XPS peaks for the elements Cu, Gd, Sb, S, and Se.

| Elements | Peak              | Binding Energy (in eV) | Oxidation State <sup>#</sup> |
|----------|-------------------|------------------------|------------------------------|
| Cu       | 2p <sub>1/2</sub> | 952.42                 | +1                           |
| Cu       | 2p <sub>3/2</sub> | 932.59                 | +1                           |
| Gd       | 3d                | 1187.80                | +3                           |
| Sb       | 3d <sub>3/2</sub> | 539.70                 | +3                           |
| Sb       | 3d <sub>5/2</sub> | 530.37                 | +3                           |
| S        | 2p <sub>1/2</sub> | 162.88                 | -2                           |

|    |            |        |    |
|----|------------|--------|----|
| S  | $2p_{3/2}$ | 161.71 | -2 |
| Se | $3d_{3/2}$ | 55.74  | -2 |
| Se | $3d_{5/2}$ | 54.22  | -2 |

#### 4. Raman spectroscopy

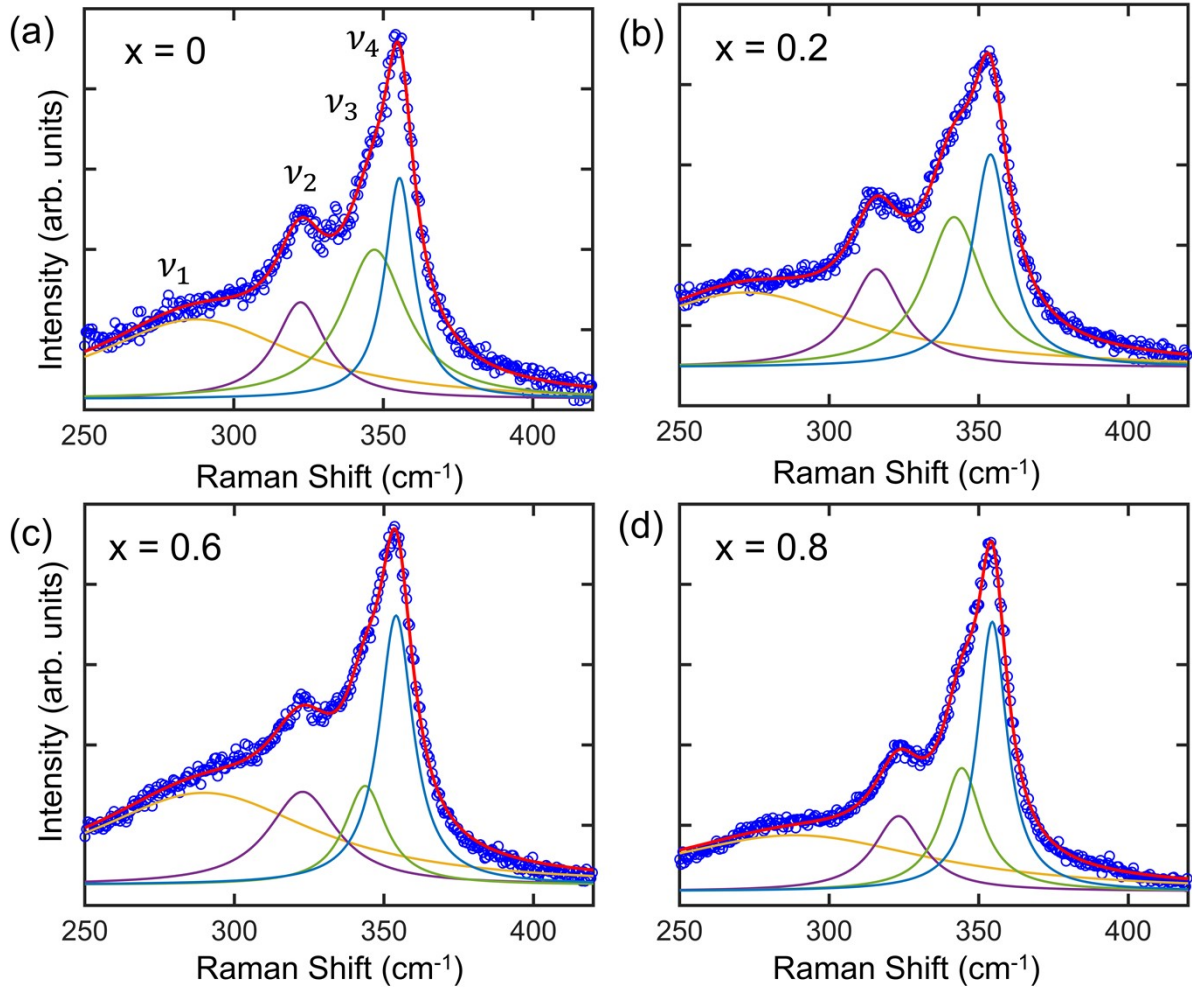

**Fig. S4** Fitted Raman spectra for the samples (a)  $x = 0$ , (b)  $x = 0.2$ , (c)  $x = 0.6$ , and (d)  $x = 0.8$

with four characteristic modes ( $\nu_1 - \nu_4$ ) marked.

#### 5. Thermoelectric properties

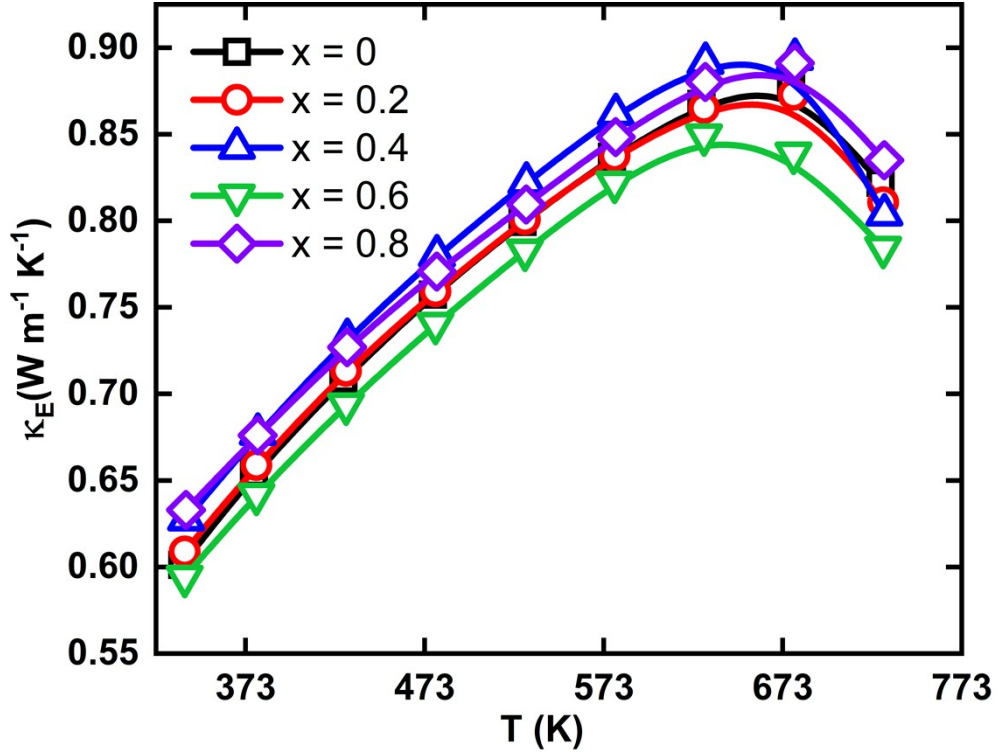

**Fig. S5** Temperature dependence of electronic part of thermal conductivity ( $\kappa_E$ ) of the samples  $\text{Cu}_{11.95}\text{Gd}_{0.05}\text{Sb}_4\text{S}_{13-x}\text{Se}_x$  ( $x = 0, 0.2, 0.4, 0.6$  and  $0.8$ ).

**Table S9.** Values of prefactors of the Callaway model

| Sample  | A (s <sup>3</sup> )    | B (s K <sup>-1</sup> ) | L (m)              |
|---------|------------------------|------------------------|--------------------|
| x = 0   | $2.11 \times 10^{-40}$ | $5.65 \times 10^{-18}$ | $6 \times 10^{-6}$ |
| x = 0.2 | $3.51 \times 10^{-40}$ | $2.13 \times 10^{-18}$ | $6 \times 10^{-6}$ |
| x = 0.4 | $2.83 \times 10^{-40}$ | $5.95 \times 10^{-18}$ | $6 \times 10^{-6}$ |
| x = 0.6 | $2.29 \times 10^{-40}$ | $4.47 \times 10^{-18}$ | $6 \times 10^{-6}$ |
| x = 0.8 | $2.23 \times 10^{-40}$ | $4.70 \times 10^{-18}$ | $6 \times 10^{-6}$ |
